# Supplementary material for: Influence of extracellular zinc on M1 microglial activation
Source: PubMed Central journal article supplement (PMC5327400; doi:10.1038/srep43778), 2017-02-27
Supplement: srep43778-s1.pdf [file srep43778-s1.pdf]

Supplementary information

## **Influence of extracellular zinc on M1 microglial activation**

Youichirou Higashi, Takaaki Aratake, Shogo Shimizu, Takahiro Shimizu, Kumiko Nakamura, Masayuki Tsuda, Toshio Yawata, Tetuya Ueba, and Motoaki Saito

Contents

Supplementary Figures S1-11

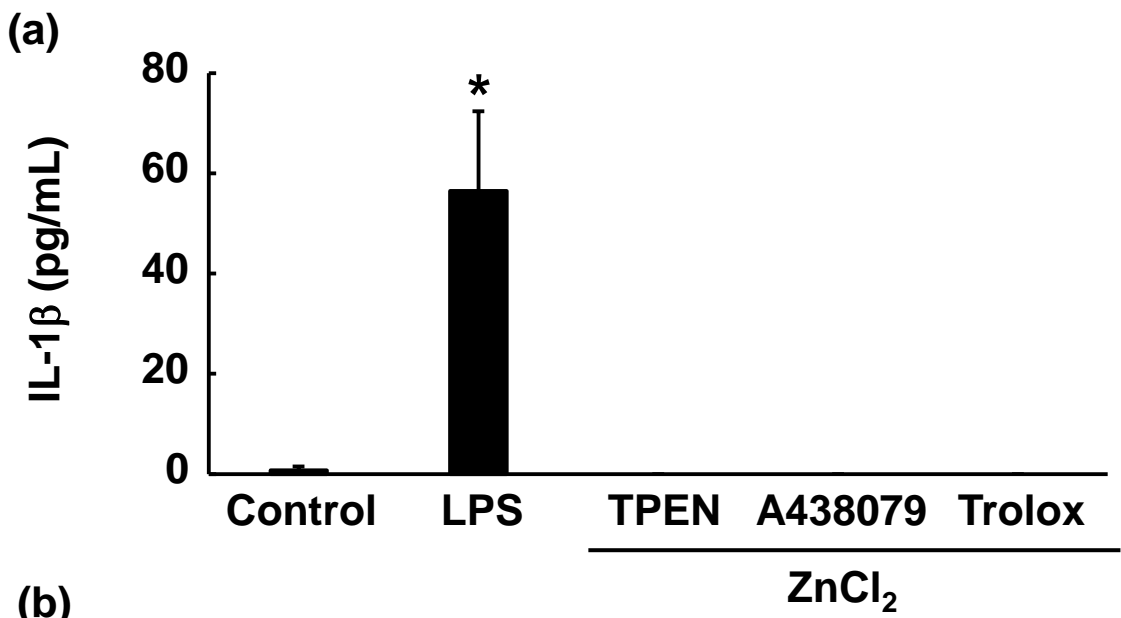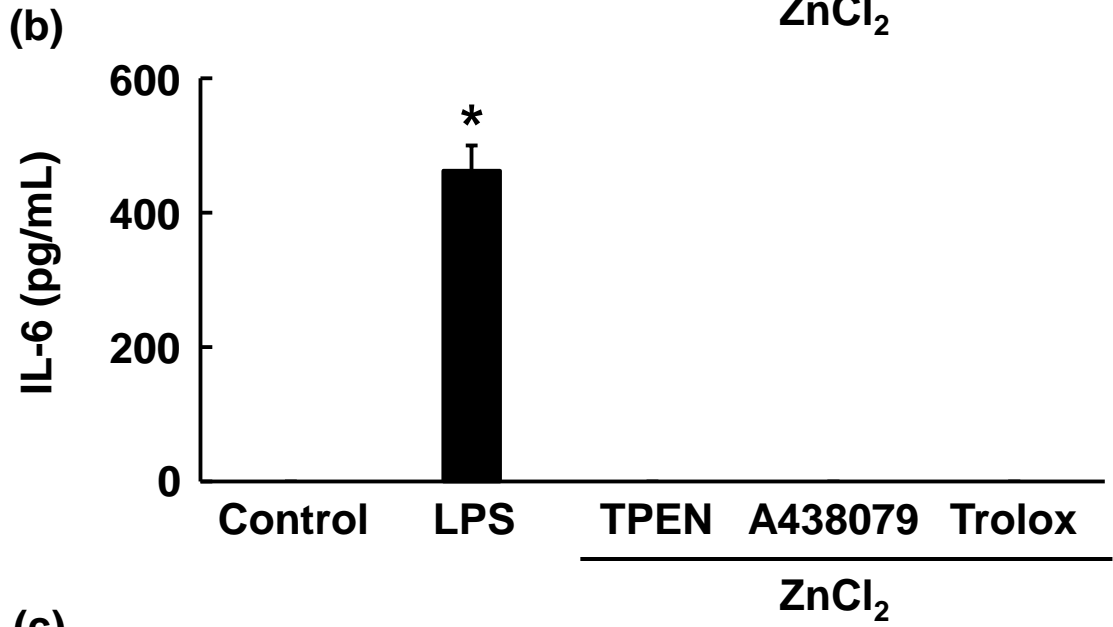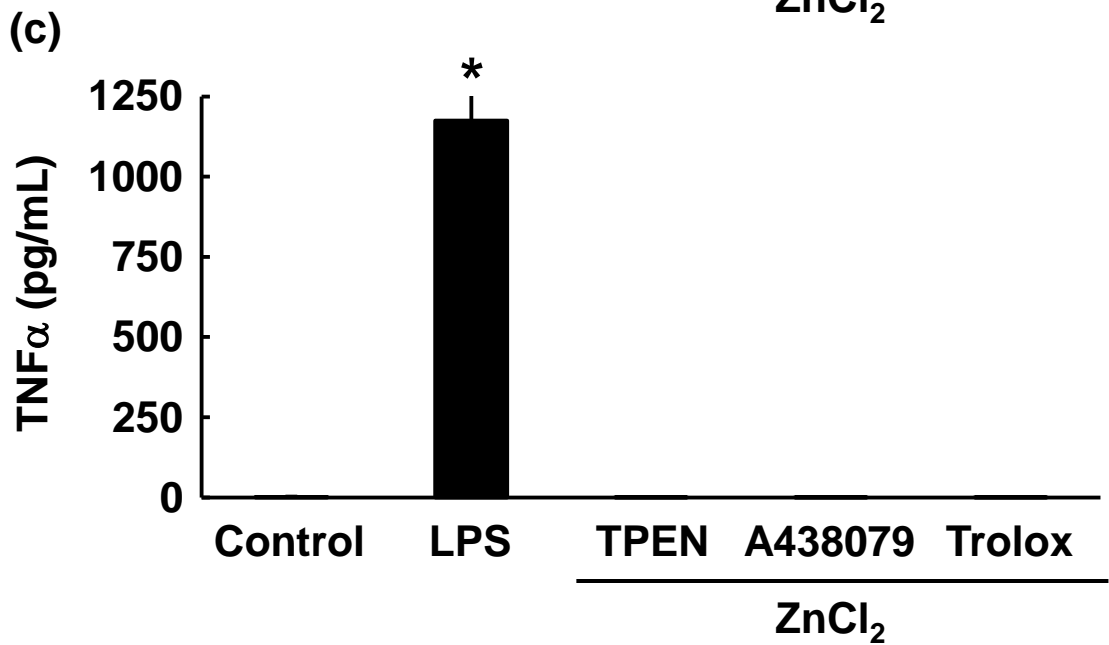

Supplementary Figure S1

## Supplementary Figure S1

**Secretion of pro-inflammatory cytokines from lipopolysaccharide (LPS)-untreated microglia.** After microglia had been treated with or without 1  $\mu\text{M}$  *N,N,N',N'*-tetrakis(2-pyridylmethyl)ethylenediamine (TPEN) for 30 min, 30  $\mu\text{M}$  A438079 for 5 min, or 500  $\mu\text{M}$  Trolox for 5 min, they were washed with warmed Eagle's minimum essential medium and incubated with 60  $\mu\text{M}$   $\text{ZnCl}_2$  for 2 h. They were then treated with or without 1 ng/mL LPS for 22 h. The levels of interleukin-1 beta (IL-1 $\beta$ ; **a**), interleukin-6 (IL-6; **b**), and tumour necrosis factor-alpha (TNF $\alpha$ ; **c**) were measured using enzyme-linked immunosorbent assays. Data are expressed as the mean  $\pm$  the standard error of the mean (n = 4). \* $p < 0.05$ , significantly different from the control group.

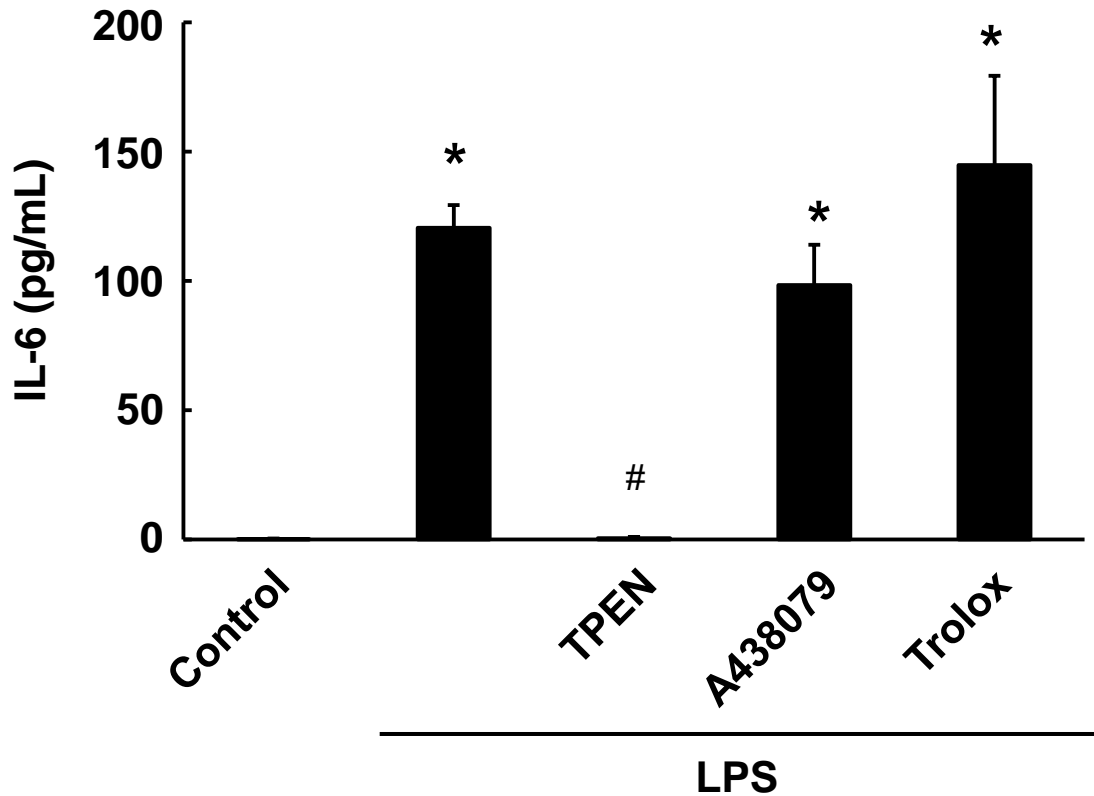

## Supplementary Figure S2

### Supplementary Figure S2

**The effects of TPEN, A438079, and Trolox on LPS-induced IL-6 secretion from microglia.** After microglia had been treated with or without 1  $\mu$ M TPEN for 30 min, 30  $\mu$ M A438079 for 5 min, or 500  $\mu$ M Trolox for 5 min, they were washed with warmed Eagle's minimum essential medium and treated with or without 1 ng/mL LPS for 22 h. Levels of IL-6 were measured using enzyme-linked immunosorbent assays. Data are expressed as the mean  $\pm$  the standard error of the mean (n = 3). \* $p$  < 0.05, significantly different from the control group. # $p$  < 0.05, significantly different from the group pre-treated with zinc followed by LPS stimulation. TPEN: *N,N,N',N'*-tetrakis(2-pyridylmethyl)ethylenediamine; LPS: lipopolysaccharide; IL-6; interleukin-6.

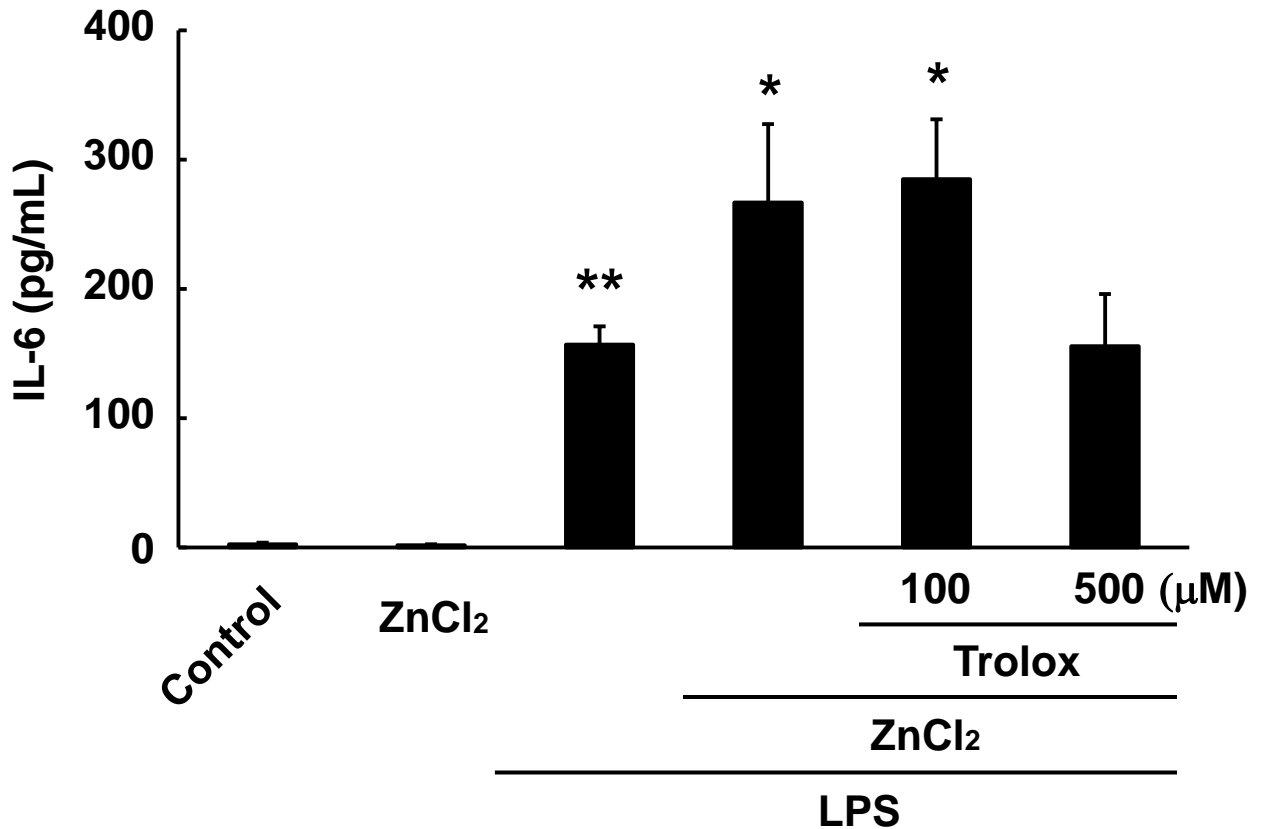

### Supplementary Figure S3

#### Supplementary Figure S3

**Zinc-enhanced IL-6 secretion from LPS-treated microglia was not inhibited by lower concentrations of Trolox.** After microglia had been treated with or without 100-500  $\mu\text{M}$  Trolox for 5 min, followed by 2-h incubation with 60  $\mu\text{M}$  ZnCl<sub>2</sub> and one washout, they were treated with 1 ng/mL LPS for 22 h. Levels of IL-6 were measured using enzyme-linked immunosorbent assays. Data are expressed as the mean  $\pm$  the standard error of the mean ( $n = 3$ ). \* $p < 0.05$ , \*\* $p < 0.01$ , \*\*\* $p < 0.001$  significantly different from the control group. LPS: lipopolysaccharide; IL-6; interleukin-6.

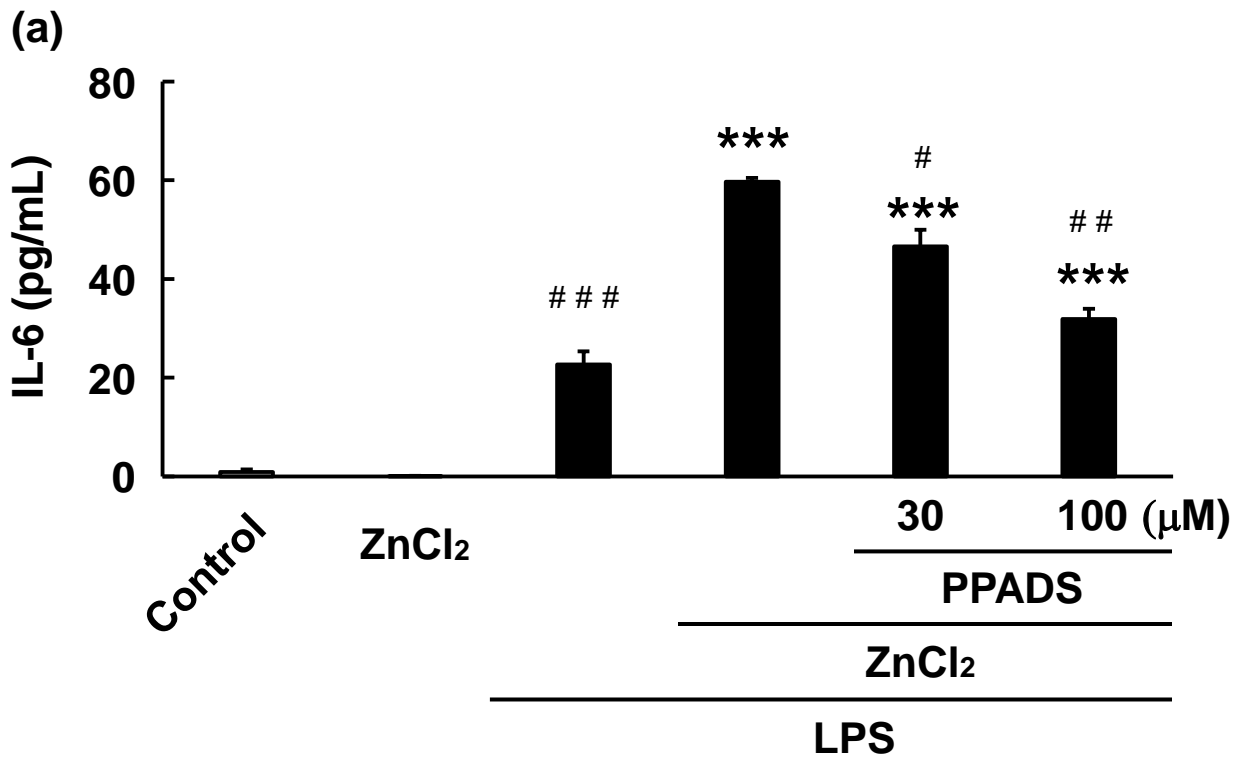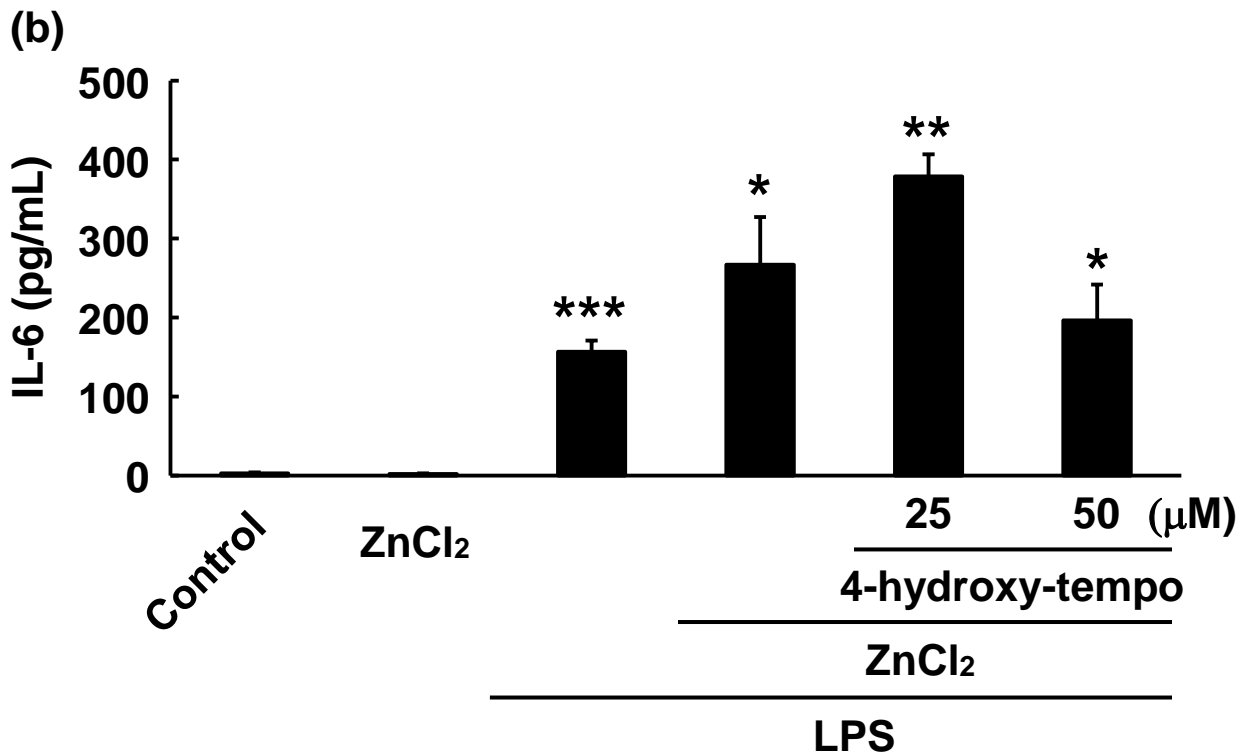

Supplementary Figure S4

## Supplementary Figure S4

**The effects of pyridoxal phosphate-6-azo(benzene-2,4-disulfonic acid)tetrasodium salt hydrate (PPADS), a P2X1-3, 5-7 receptor antagonist, and 4-hydroxy-tempo , a ROS scavenger, on zinc-enhanced IL-6 secretion from LPS-treated microglia.** After microglia had been treated with or without 30-100  $\mu\text{M}$  pyridoxal phosphate-6-azo(benzene-2,4-disulfonic acid)tetrasodium salt hydrate (PPADS) (**a**) or 25-50  $\mu\text{M}$  4-hydroxy-tempo (**b**) for 5 min, followed by 2-h incubation with 60  $\mu\text{M}$   $\text{ZnCl}_2$  and one washout, they were treated with 1 ng/mL LPS for 22 h. Levels of IL-6 were measured using enzyme-linked immunosorbent assays. Data are expressed as the mean  $\pm$  the standard error of the mean (n = 3). \* $p$  < 0.05, \*\* $p$  < 0.01, \*\*\* $p$  < 0.001 significantly different from the control group; # $p$  < 0.05, ## $p$  < 0.01, significantly different from the group pre-treated with zinc followed by LPS stimulation.

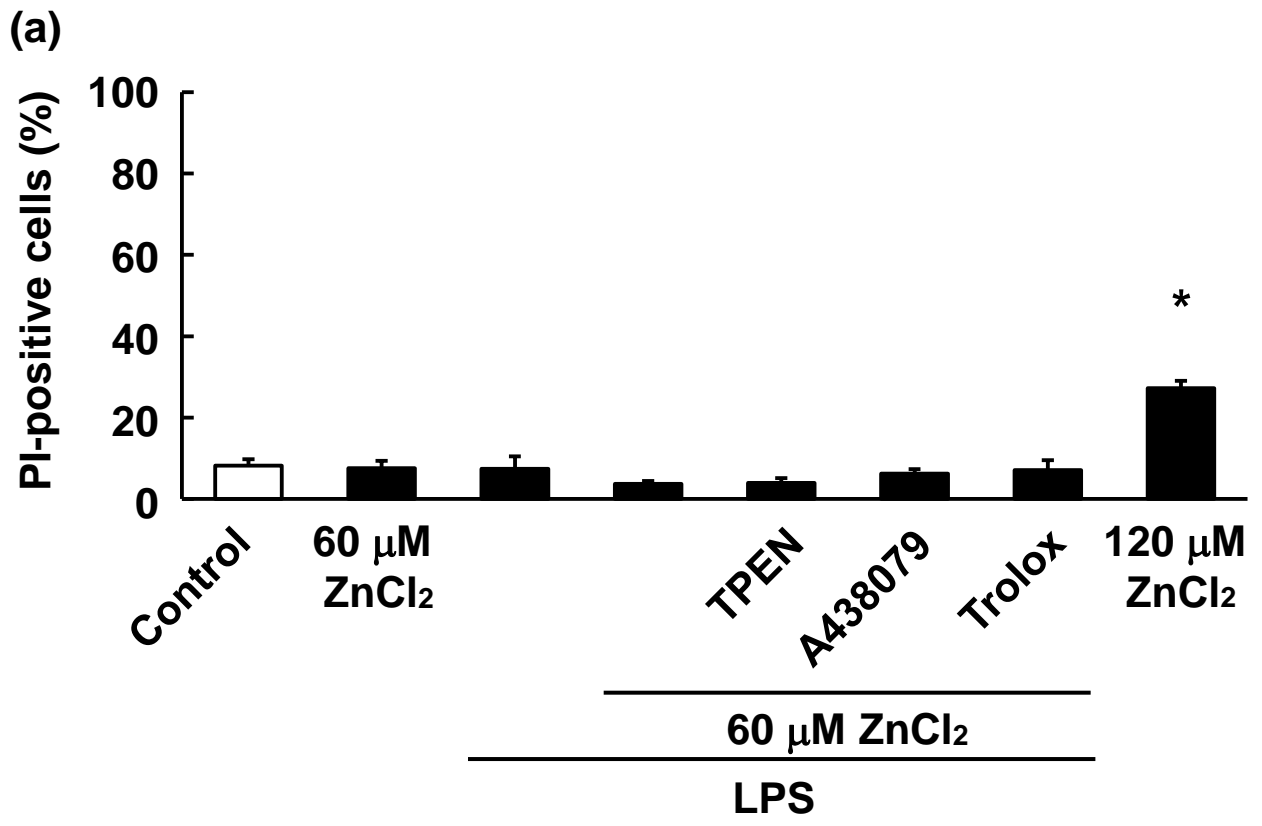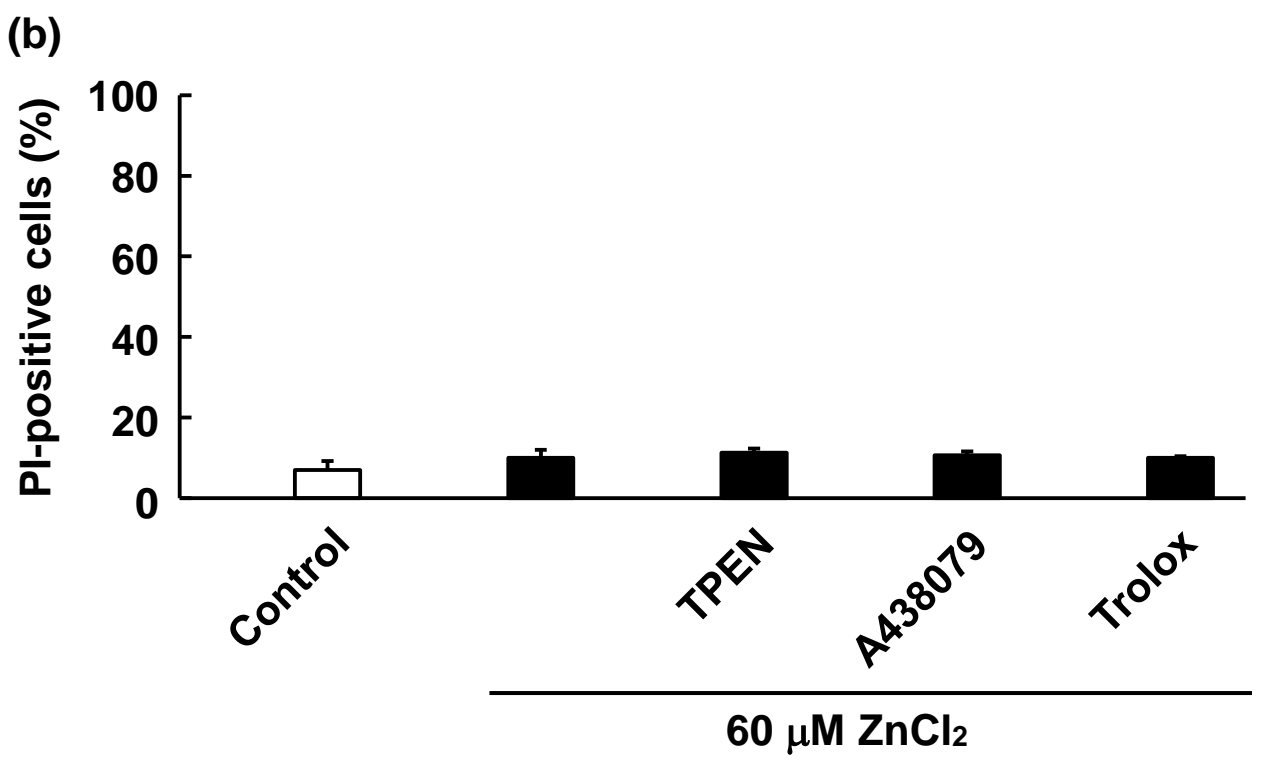

Supplementary Figure S5



## Supplementary Figure S5

**Microglial cell viability.** After microglia had been treated with or without 1  $\mu$ M TPEN for 30 min, 30  $\mu$ M A438079 for 5 min, or 500  $\mu$ M Trolox for 5 min, they were washed with warmed Eagle's minimum essential medium and incubated with 60-120  $\mu$ M ZnCl<sub>2</sub> for 2 h. They were then treated with (a) or without (b) 1 ng/mL LPS for 22 h. Cell viability as evaluated by cell counting through propidium iodide (PI) staining. Data are expressed as the mean  $\pm$  the standard error of the mean (n = 3). \* $p$  < 0.05, significantly different from the control group. TPEN: *N,N,N',N'*-tetrakis(2-pyridylmethyl)ethylenediamine; LPS: lipopolysaccharide.

(a)

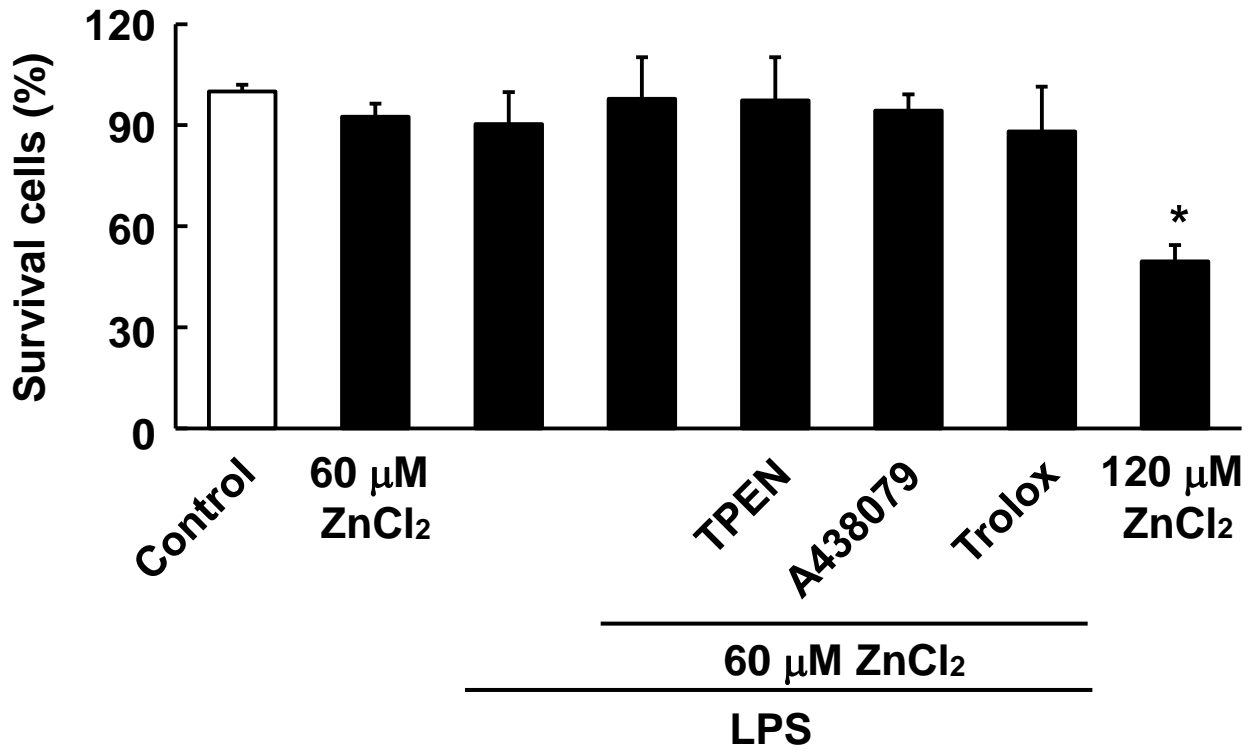

(b)

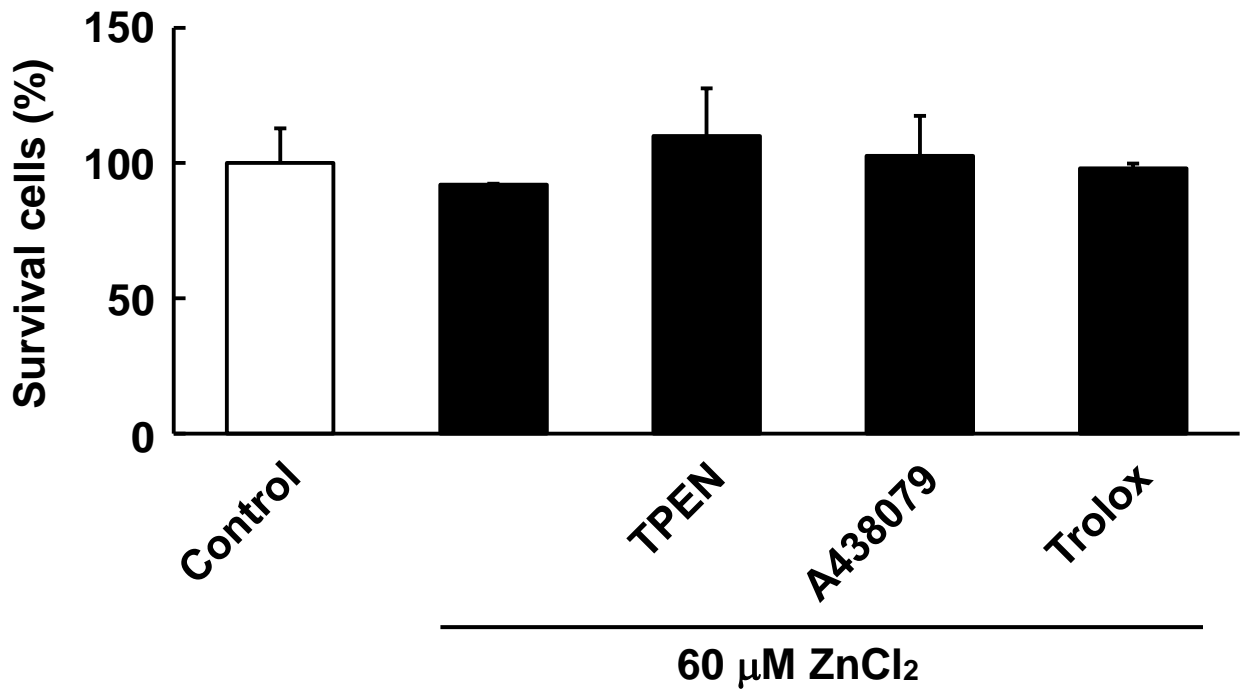

Supplementary Figure S6

## Supplementary Figure S6

**Microglial cell proliferation.** After microglia had been treated with or without 1  $\mu$ M TPEN for 30 min, 30  $\mu$ M A438079 for 5 min, or 500  $\mu$ M Trolox for 5 min, they were washed with warmed Eagle's minimum essential medium and incubated with 60-120  $\mu$ M ZnCl<sub>2</sub> for 2 h. They were then treated with **(a)** or without **(b)** 1 ng/mL LPS for 22 h. The number of PI-negative cells was regarded as the number of living cells. Data are expressed as the mean  $\pm$  the standard error of the mean (n = 3). \* $p$  < 0.05, significantly different from the control group. PI: propidium iodide; TPEN: *N,N,N',N'*-tetrakis(2-pyridylmethyl)ethylenediamine; LPS: lipopolysaccharide.

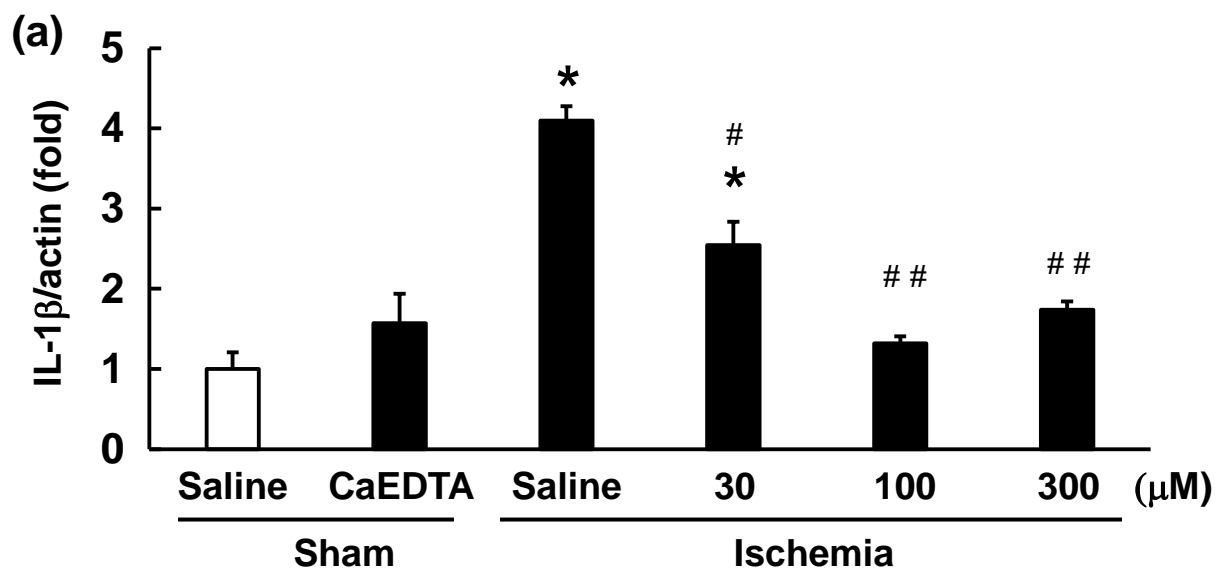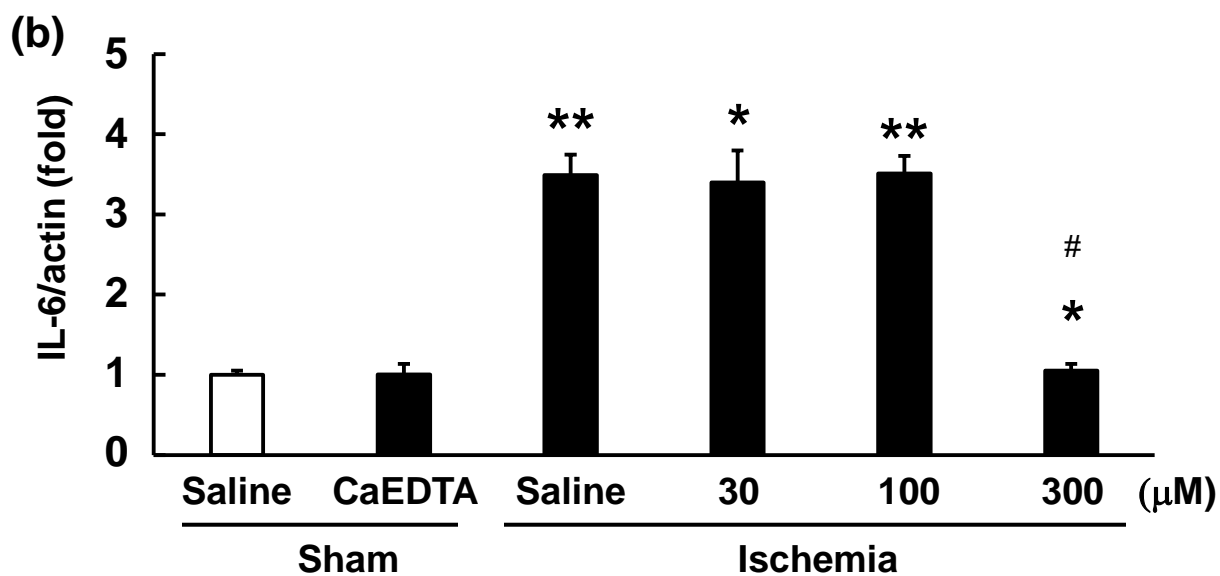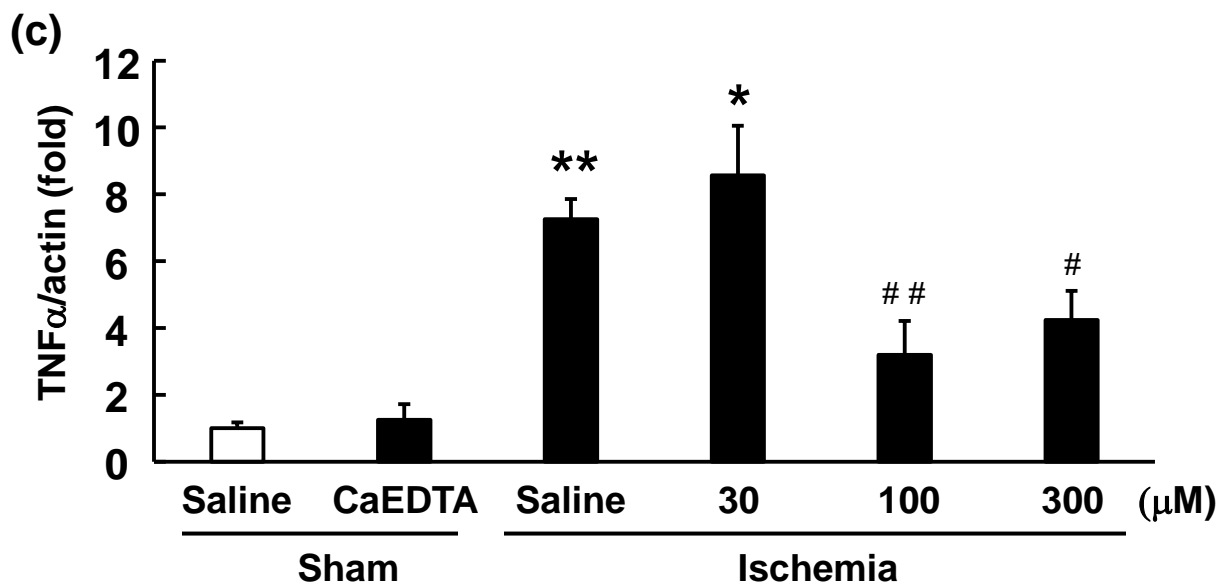

Supplementary Figure S7

## Supplementary Figure S7

**Dose-dependent attenuation of ischaemia-induced expression of IL-1 $\beta$  in the hippocampus following CaEDTA pre-administration.** Mice were subjected to transient forebrain ischaemia 5 min after intraventricular injection of a zinc chelator, CaEDTA (30-300 mM in 2  $\mu$ L volume). Real-time quantitative polymerase chain reaction was performed using total RNA extracted from the hippocampus of mouse brains 3 days after ischaemia. The amount of mRNA for interleukin-1 beta (IL-1 $\beta$ ) (**a**), interleukin-6 (IL-6) (**b**), and tumour necrosis factor-alpha (TNF $\alpha$ ) (**c**) was normalised to the amount of mRNA for  $\beta$ -actin. Data are expressed as the mean  $\pm$  the standard error of the mean (n = 3). \* $p$  < 0.01, significantly different from the vehicle-treated sham group; # $p$  < 0.05, ## $p$  < 0.001, significantly different from the vehicle-treated ischaemic group.

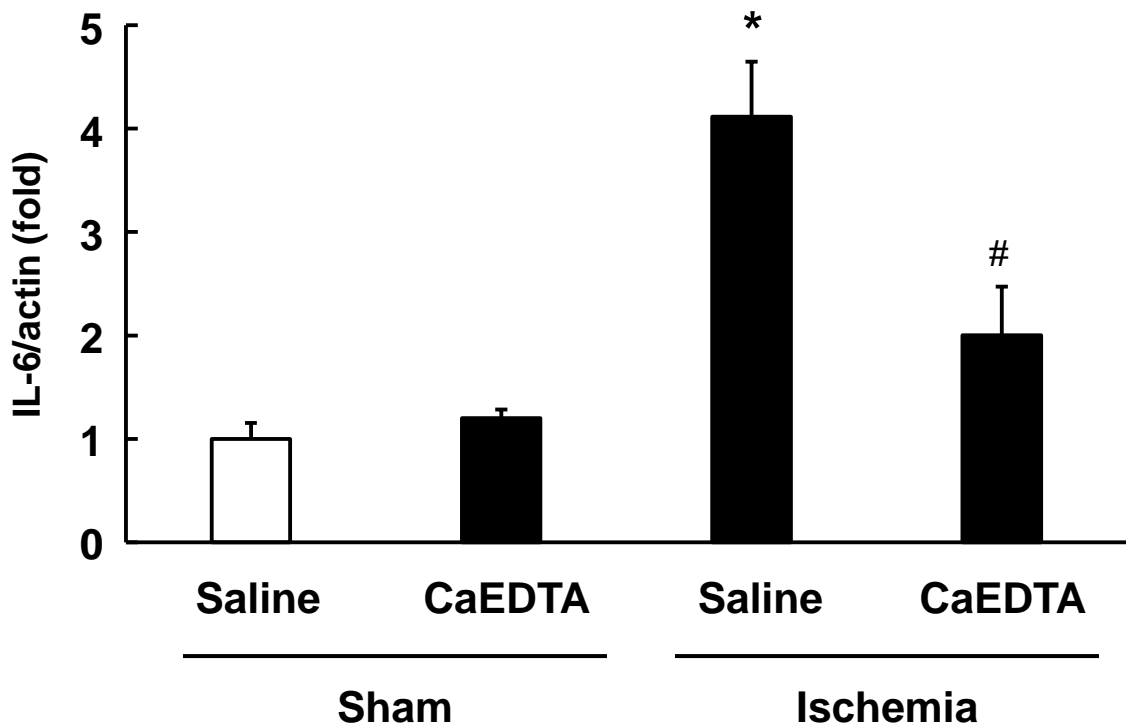

### Supplementary Figure S8

#### Supplementary Figure S8

**Effects of a zinc chelator on increased expression of IL-6 mRNA in the hippocampus 5 days after ischaemia.** Mice were subjected to transient forebrain ischaemia 5 min after intraventricular injection of a zinc chelator, CaEDTA (300 mM in 2  $\mu$ L volume). Real-time quantitative polymerase chain reaction was performed using total RNA extracted from the hippocampus of mouse brains 5 days after ischaemia. The amount of mRNA for IL-6 was normalised to the amount of mRNA for  $\beta$ -actin. Data are expressed as the mean  $\pm$  the standard error of the mean (n = 4). \* $p$  < 0.05, significantly different from the vehicle-treated sham group; # $p$  < 0.01, significantly different from the vehicle-treated ischaemic group.

**(a)**

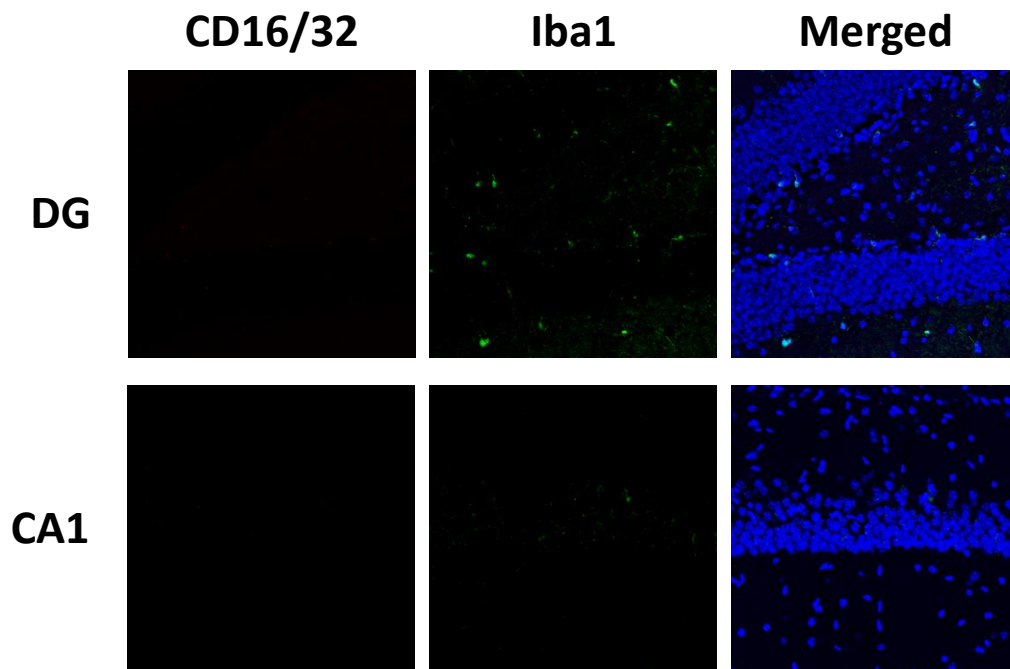

**(b)**

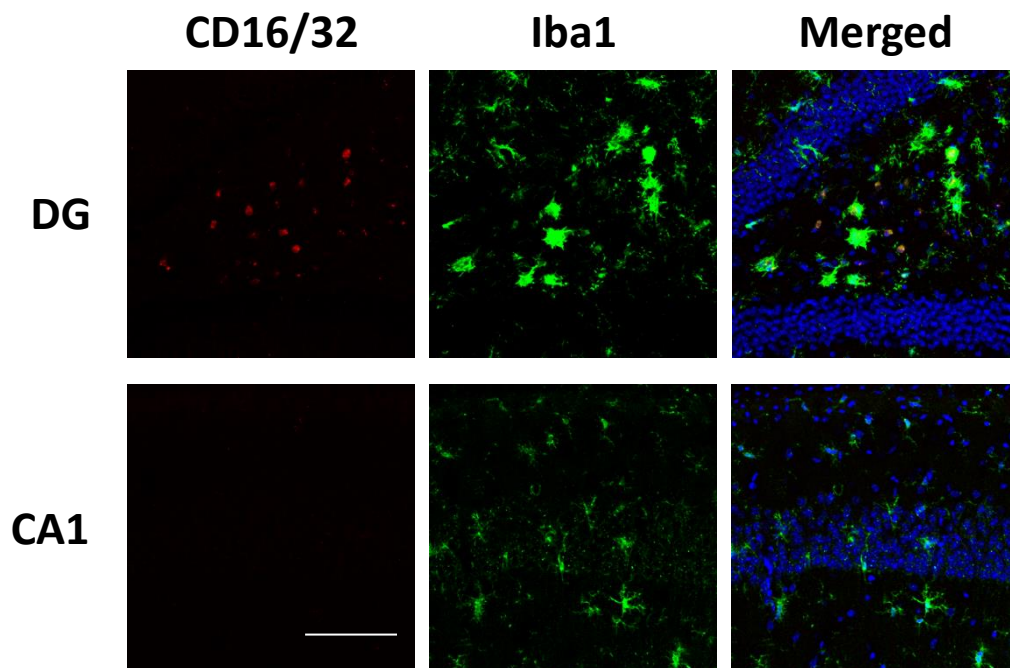

**Supplementary Figure S9**

### **Supplementary Figure S9**

**M1 activation of microglia in the dentate gyrus (DG), but not CA1, of the hippocampus after cerebral ischaemia.** Mice were subjected to sham injury (**a**) or transient forebrain ischaemia (**b**). Representative images of fluorescent double staining of CD16/32 (red) and Iba1 (green) in the hippocampal DG and CA1 region 3 days after ischaemia. Nuclei were stained with DAPI (blue). Scale bar = 100  $\mu\text{m}$ .



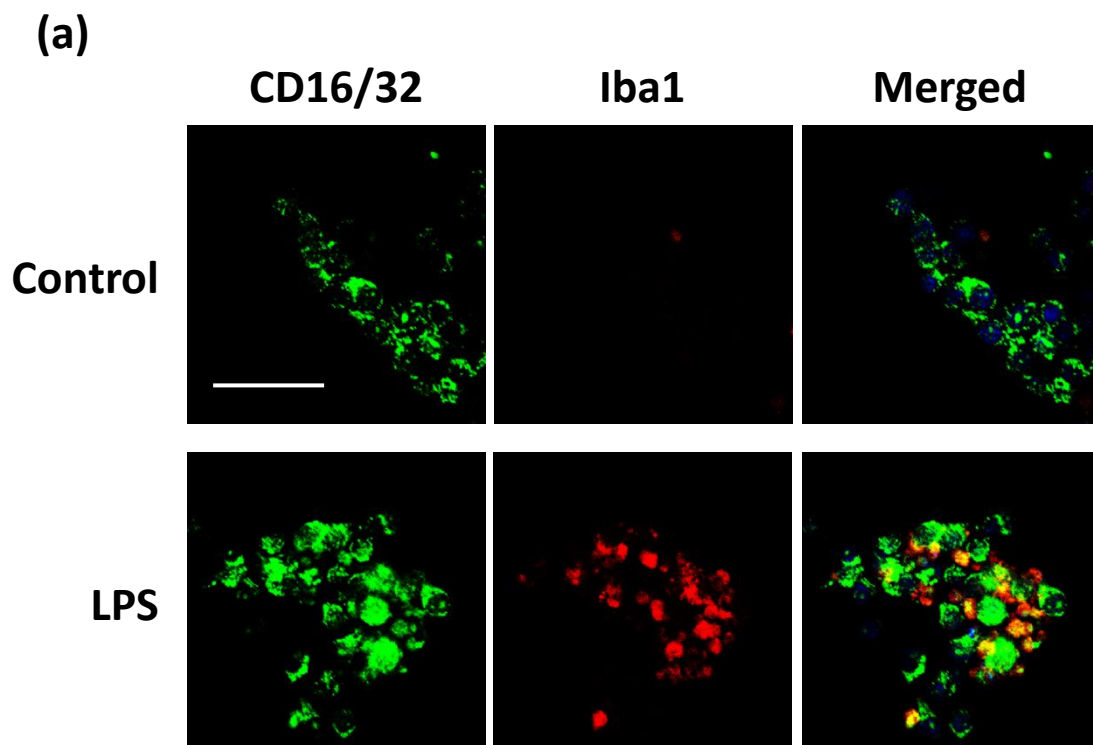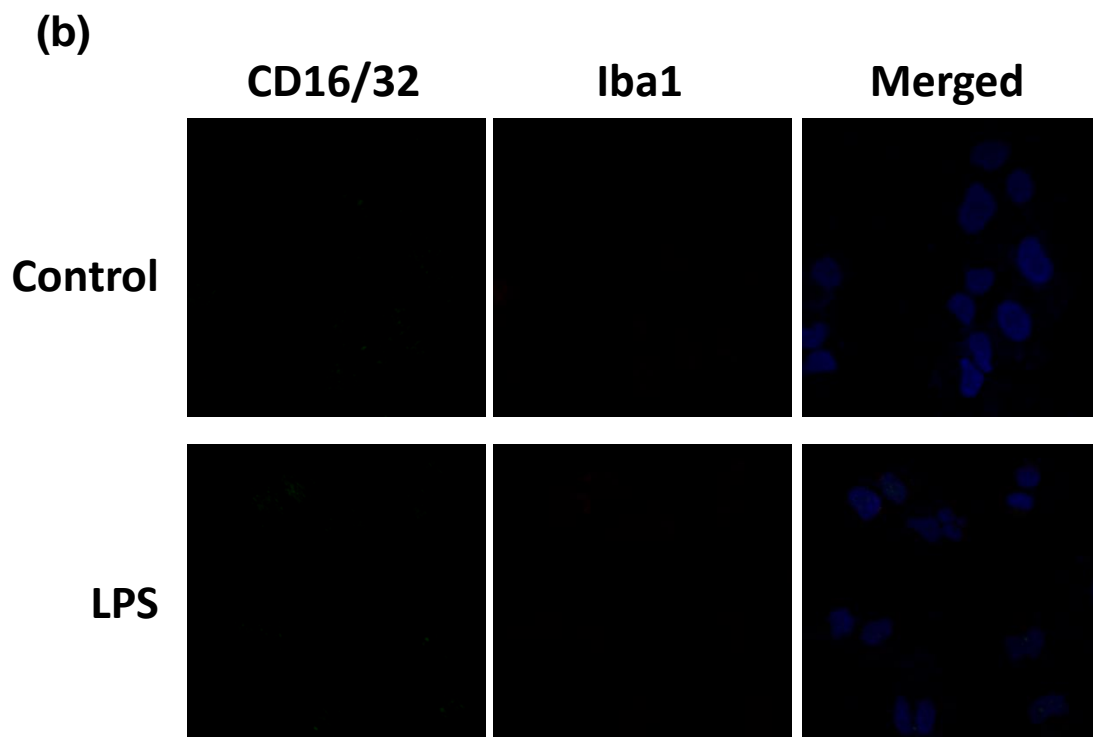

**Supplementary Figure S10**

## Supplementary Figure S10

**Verification of antibodies specificity.** BV2 cells (**a**) and T98G cells (**b**) were treated with 100 ng/mL LPS for 48 h. Representative images of fluorescent double staining of CD16/32 (red) and Iba1 (green) in BV2 cells and T98G cells. Merged images depict CD16/32-positive signal (yellow). The nuclei were stained with DAPI (blue). Scale bar = 60  $\mu\text{m}$ .

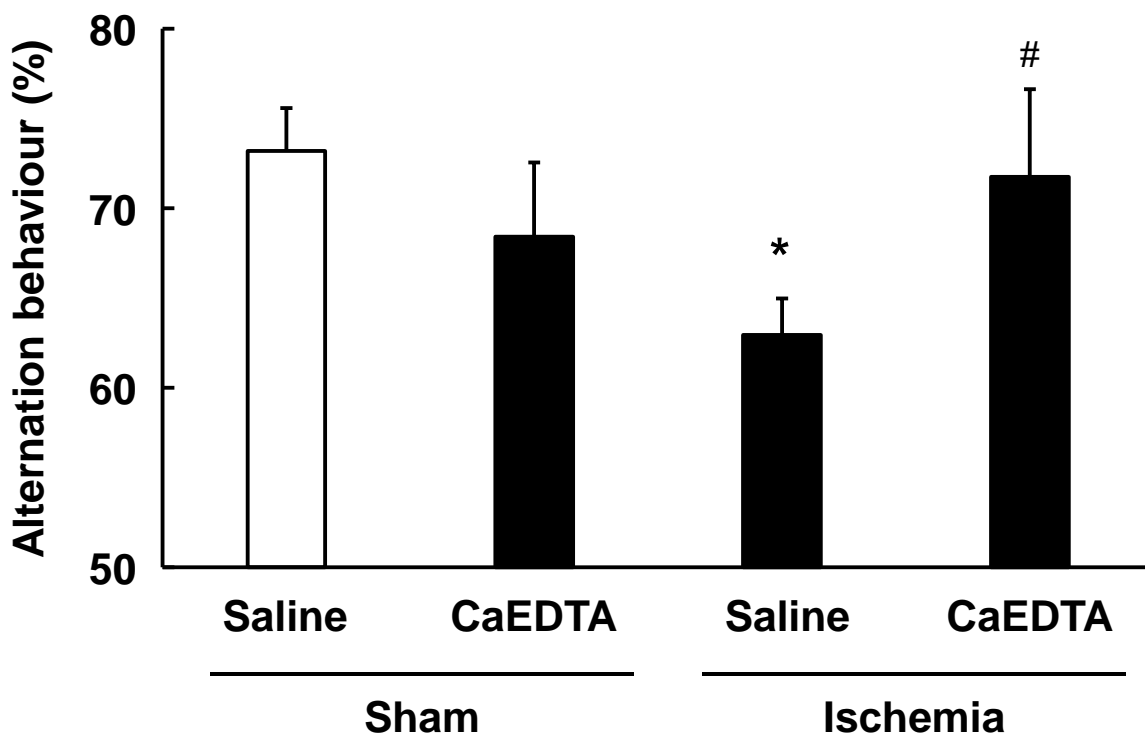

### Supplementary Figure S11

#### Supplementary Figure S11

**Prevention of ischaemia-induced short-term working memory deficits by CaEDTA pre-treatment.** The Y-maze test was performed 5 days after transient forebrain ischaemia. Percentage of alternation during a 10-min session in the Y-maze test was measured. Data are expressed as the mean  $\pm$  the standard error of the mean ( $n = 5$ ). \* $p < 0.01$ , significantly different from the vehicle-treated ischaemic group. # $p < 0.05$ , significantly different from the saline-treated ischaemic group.
